# Supplementary material
Source: PubMed Central journal article supplement (PMC6119140)
Supplement: 2018_192435-Disclosures_and_Contributions.pdf [file 2018_192435-Disclosures_and_Contributions.pdf]

Haematologica  
HAEMATOL/2018/192435  
Version 3

t(11;14)-positive mantle cell Lymphomas lacking cyclin D1 (CCND1) immunostaining because of a CCND1 mutation or exclusive expression of the CCND1b isoform

Ingram Iaccarino, Lamis Afify, Sietse M. Aukema, Katharina Reddemann, Philipp Schütt, Martin Flür, and Wolfram Klapper

Disclosures: None

Contributions: II and LF performed research; PS and MF provided samples; SMA, KR, II and WK analyzed the samples; WK and II conceived the research project; II and WK wrote the manuscript
